# Supplementary material for: Missed opportunities for improving practice performance in adult immunizations: a meta-narrative review of the literature
Source: PubMed Central journal article supplement (PMC5741967; doi:10.1186/s12875-017-0694-1), 2017-12-22
Supplement: 12875_2017_694_MOESM1_ESM.pdf [file 12875_2017_694_MOESM1_ESM.pdf]

Influenza Vaccines/administration & dosage\*

- Pneumococcal Vaccines/administration & dosage\*
- Vaccination/statistics & numerical data\*

Influenza, Human/prevention & control\*

Medicare/statistics & numerical data\*

Cohort Studies

- Medicare/standards

Pneumococcal Infections/prevention & control\*

Health Services/utilization\*

Immunization Programs/utilization\*

- Opportunistic Infections/epidemiology
- Opportunistic Infections/prevention & control\*
- Population Surveillance
- Referral and Consultation/utilization

Reminder Systems\*

Primary Health Care/organization & administration

Electronic Health Records\*

Medical Records\*

“missed opportunities”
